# Supplementary material for: A High-Performance Antibacterial Nanostructured ZnO Microfluidic Device for Controlled Bacterial Lysis and DNA Release
Source: MDPI journal article supplement (doi:10.3390/antibiotics12081276), 2023-08-02
Supplement: s1 [file s1]

# A High-Performance Antibacterial Nanostructured ZnO Microfluidic Device for Controlled Bacterial Lysis and DNA Release

Yvonne Xesfyngi <sup>1</sup>, Maria Georgoutsou-Spyridonos <sup>1</sup>, Abinash Tripathy <sup>2</sup>, Athanasios Milionis <sup>2</sup>, Dimos Poulidakos <sup>2</sup>, Dimitrios C. Mastellos <sup>3</sup>, and Angeliki Tserepi <sup>1,\*</sup>

- <sup>1</sup> Institute of Nanoscience and Nanotechnology, National Center for Scientific Research (NCSR) "Demokritos", Patr. Gregoriou E' and 27 Neapoleos Str., 15341 Aghia Paraskevi, Greece; yvonnix@gmail.com (Y.X.); maria.georgoutsou.spyridonos@gmail.com (M.G.-S.)
- <sup>2</sup> Laboratory of Thermodynamics in Emerging Technologies, Department of Mechanical and Process Engineering, ETH Zurich, 8092 Zurich, Switzerland; atripathy8@gmail.com (A.T.); athanasios.milionis@lnt.iet.mavt.ethz.ch (A.M.); dpoulidakos@ethz.ch (D.P.)
- <sup>3</sup> Institute of Nuclear & Radiological Sciences and Technology, Energy & Safety, National Center for Scientific Research (NCSR) "Demokritos", Patr. Gregoriou E' and 27 Neapoleos Str., 15341 Aghia Paraskevi, Greece; mastellos@rrp.demokritos.gr
- \* Correspondence: a.tserepi@inn.demokritos.gr

## Supplementary Material

EtBr was intercalated to *E. coli* DNA in amounts ranging from 0.1 to 1 ng, and a gel image was obtained from which the fluorescence intensity (FI) was estimated via ImageJ. Figure S1 shows FI as a function of the *E. coli* DNA amount, where a rather good linear dependence is indicated for DNA up to 1 ng (and FI up to 5000 a.u.).

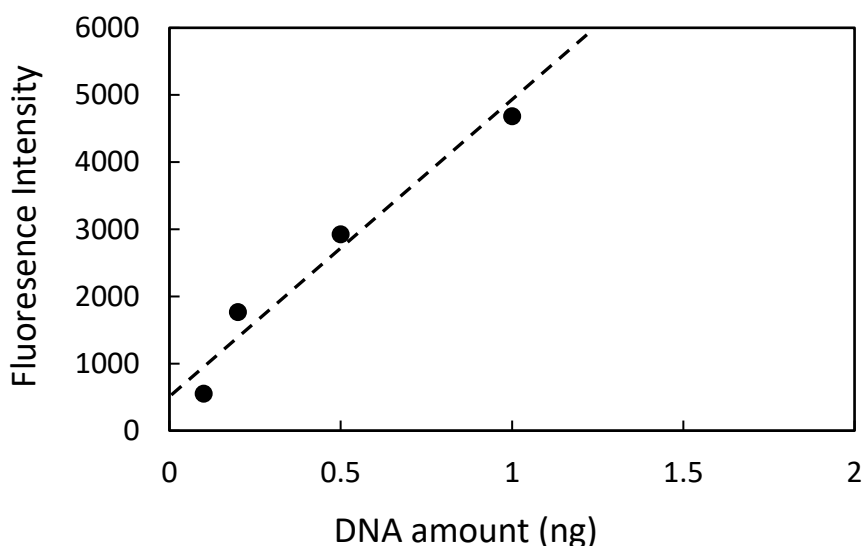

**Figure S1.** Standard curve for fluorescence intensity as a function of *E. coli* DNA in the range 0.1–1 ng.
